# Supplementary material
Source: MDPI journal article supplement (https://www.mdpi.com/2311-5637/9/11/981)
Supplement: s1 [file s1]

# Supporting Information for

## Application of aromatic ring quaternary ammonium and phosphonium salts-carboxylic acids based deep eutectic solvent for enhanced sugarcane bagasse pretreatment, enzymatic hydrolysis, and cellulosic ethanol production

Biying Li<sup>1</sup>, Ziqi Qiu<sup>1</sup>, Jiale Huang<sup>1</sup>, Xiaoling Xian<sup>1</sup>, Xiaojie Zheng<sup>1</sup>, Xiaoqing Lin<sup>1,2,3,\*</sup>

<sup>1</sup> School of Chemical Engineering and Light Industry, Guangdong University of Technology, No. 100 Waihuan Xi Road, Panyu District, Guangzhou 510006, People's Republic of China

<sup>2</sup> Guangdong Provincial Key Laboratory of Plant Resources Biorefinery, Guangdong University of Technology, Guangzhou 510006, People's Republic of China

\* Correspondence: linxiaoqing@gdut.edu.cn

Table S1 ANOVA analysis and principal effects for HBDs (H) with TEBAC as HBA

| Effects                          |       | Sum of squares | d.f. <sup>a</sup> | Mean square | F-value  | p-value  |
|----------------------------------|-------|----------------|-------------------|-------------|----------|----------|
| Glucose concentration (g/L)      | H     | 1289.566       | 2                 | 644.783     | 1331.737 | < 0.001* |
|                                  | Error | 1.452          | 3                 | 0.484       |          |          |
|                                  | Total | 1291.018       | 5                 |             |          |          |
| Xylose concentration (g/L)       | H     | 12.283         | 2                 | 6.142       | 84.809   | 0.002    |
|                                  | Error | 0.217          | 3                 | 0.072       |          |          |
|                                  | Total | 12.500         | 5                 |             |          |          |
| Total sugars concentration (g/L) | H     | 1551.092       | 2                 | 775.546     | 1581.188 | < 0.001* |
|                                  | Error | 1.471          | 3                 | 0.490       |          |          |
|                                  | Total | 1552.564       | 5                 |             |          |          |
| Cellulose digestibility (%)      | H     | 1341.971       | 2                 | 670.986     | 554.060  | < 0.001* |
|                                  | Error | 3.633          | 3                 | 1.211       |          |          |
|                                  | Total | 1345.604       | 5                 |             |          |          |
| Xylose digestibility (%)         | H     | 1847.380       | 2                 | 923.690     | 243.406  | < 0.001* |
|                                  | Error | 11.385         | 3                 | 3.795       |          |          |
|                                  | Total | 1858.765       | 5                 |             |          |          |
| Total sugars digestibility (%)   | H     | 1369.653       | 2                 | 684.827     | 790.397  | < 0.001* |
|                                  | Error | 2.599          | 3                 | 0.866       |          |          |
|                                  | Total | 1372.252       | 5                 |             |          |          |

<sup>a</sup> Degree of freedom

\* Significant

Table S2 ANOVA analysis and principal effects for HBDs (H) with BPP as HBA

| Effects                          |       | Sum of squares | d.f. <sup>a</sup> | Mean square | F-value  | p-value  |
|----------------------------------|-------|----------------|-------------------|-------------|----------|----------|
| Glucose concentration (g/L)      | H     | 1002.630       | 2                 | 501.315     | 2396.726 | < 0.001* |
|                                  | Error | 0.627          | 3                 | 0.209       |          |          |
|                                  | Total | 1003.258       | 5                 |             |          |          |
| Xylose concentration (g/L)       | H     | 17.042         | 2                 | 8.521       | 2061.500 | < 0.001* |
|                                  | Error | 0.012          | 3                 | 0.004       |          |          |
|                                  | Total | 17.054         | 5                 |             |          |          |
| Total sugars concentration (g/L) | H     | 1278.411       | 2                 | 639.205     | 4077.432 | < 0.001* |
|                                  | Error | 0.470          | 3                 | 0.157       |          |          |
|                                  | Total | 1278.881       | 5                 |             |          |          |
| Cellulose digestibility (%)      | H     | 1009.750       | 2                 | 504.875     | 1031.972 | < 0.001* |
|                                  | Error | 1.468          | 3                 | 0.489       |          |          |
|                                  | Total | 1011.218       | 5                 |             |          |          |
| Xylose digestibility (%)         | H     | 867.830        | 2                 | 433.915     | 3276.893 | < 0.001* |
|                                  | Error | 0.397          | 3                 | 0.132       |          |          |
|                                  | Total | 868.228        | 5                 |             |          |          |
| Total sugars digestibility (%)   | H     | 962.013        | 2                 | 481.006     | 2089.667 | < 0.001* |
|                                  | Error | 0.691          | 3                 | 0.230       |          |          |
|                                  | Total | 962.703        | 5                 |             |          |          |

<sup>a</sup> Degree of freedom

\* Significant
